# Supplementary material for: Larval breeding water drives differential selection pressures on genetic insecticide resistance and metabolic enzyme plasticity in Anopheles gambiae s.l
Source: Research Square preprint supplement (doi:10.21203/rs.3.rs-8493684/v1), 2026-01-08

**Larval breeding water drives differential selection pressures on genetic insecticide resistance and metabolic enzyme plasticity in *Anopheles gambiae* s.l.**

Ibrahim K. Gyimah1,2,3*, Godwin K. Amlalo1,2, Rebecca Pwalia1,2, Samuel S. Akporh1,2, Aaron A. Lartey1,2, Akua O.Y. Danquah1,2, Dominic Acquah-Baidoo1,2, Sampson Gbagba1,2, Ali B.I. Alhassan1,2, Joannitta Joannides1,2, Samuel O. Darkwah1, Godwin A. Koffa2, Duncan K. Athinya4, Rinki Deb5, Samuel K. Dadzie2,3, Jewelna Akorli2*

**Figure S1: The temporal variations of water physicochemical parameters across three larval environments.** The estimates were made at Weeks 1, Week 7, Week 13, Week 19, and Week 25 during the 25-week experimental period.
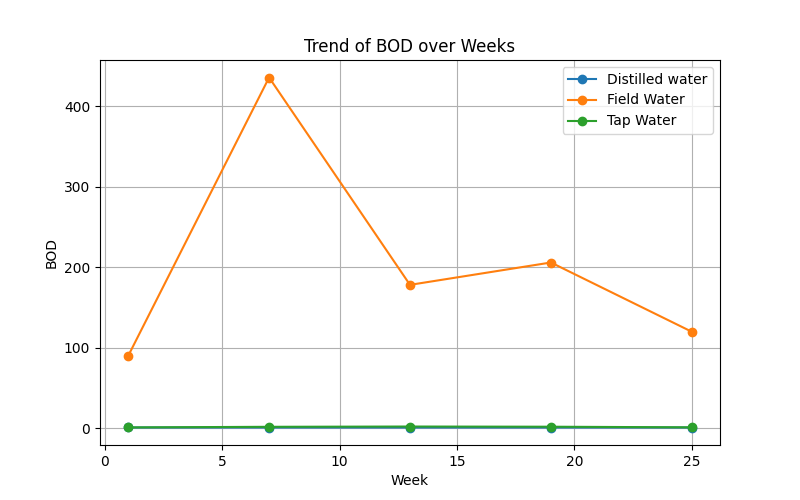

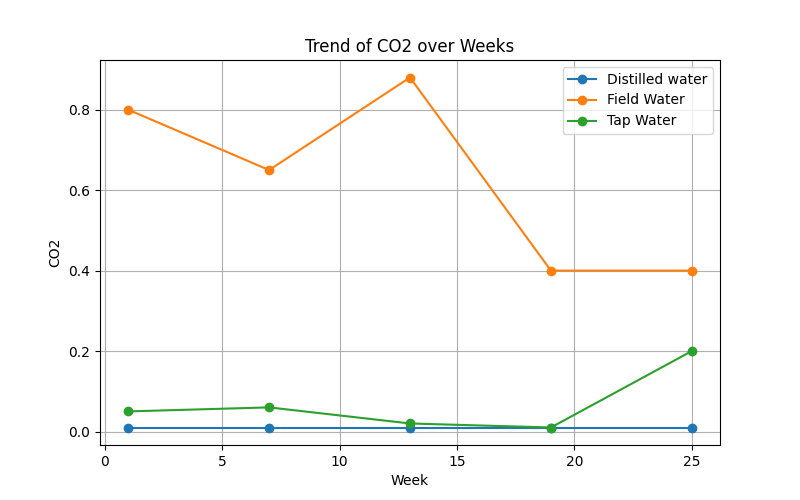

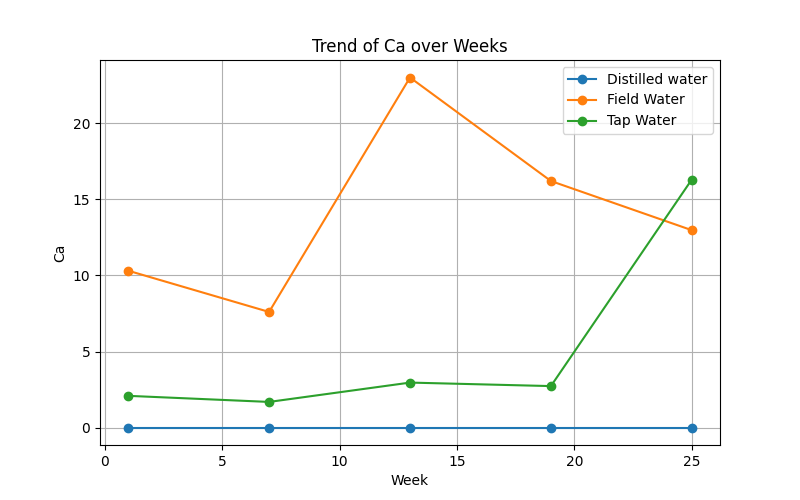

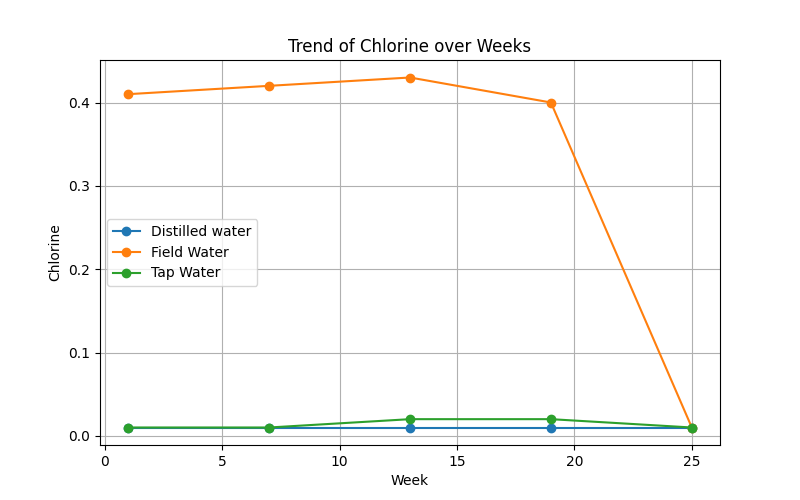

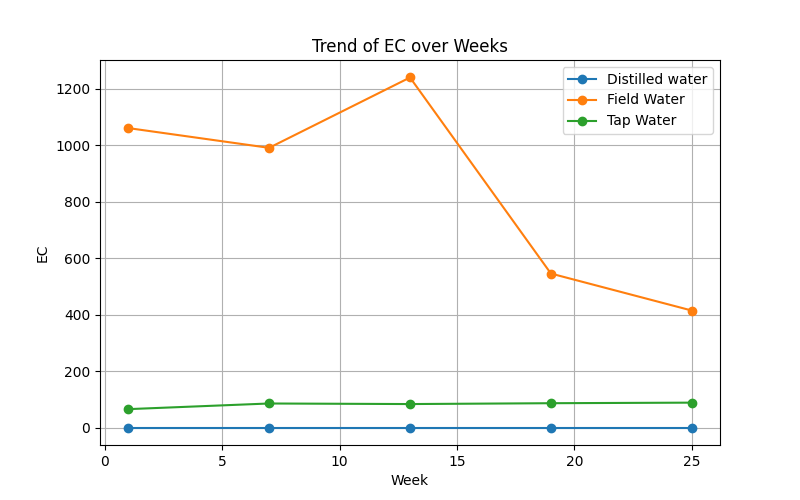

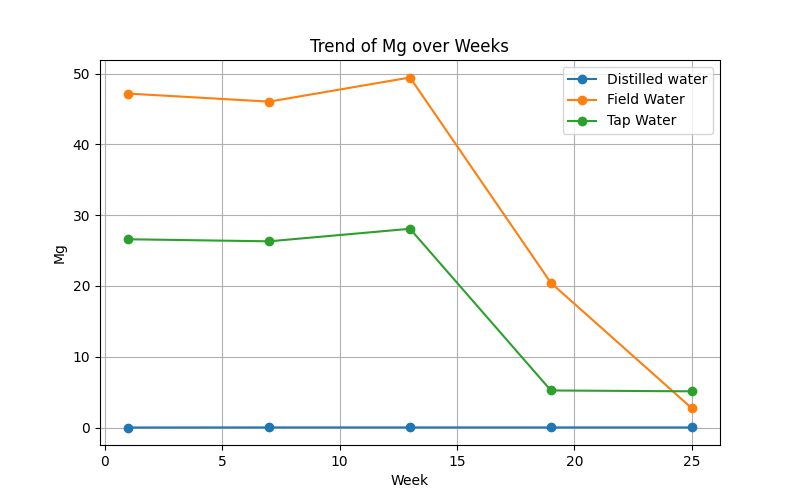

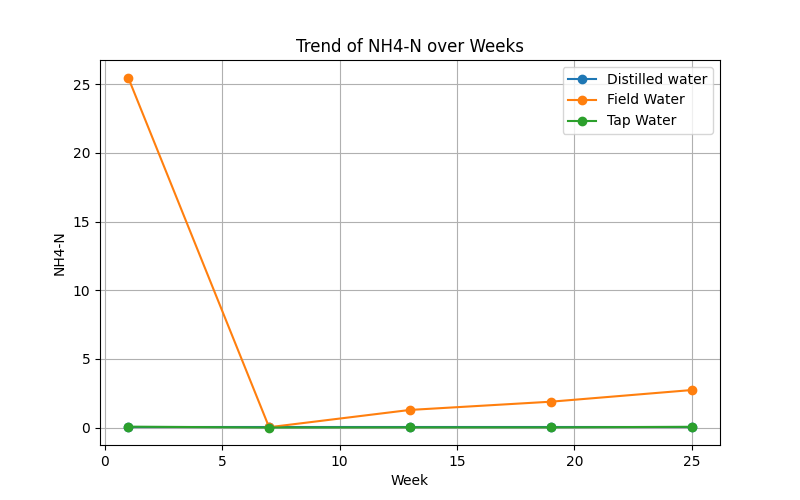

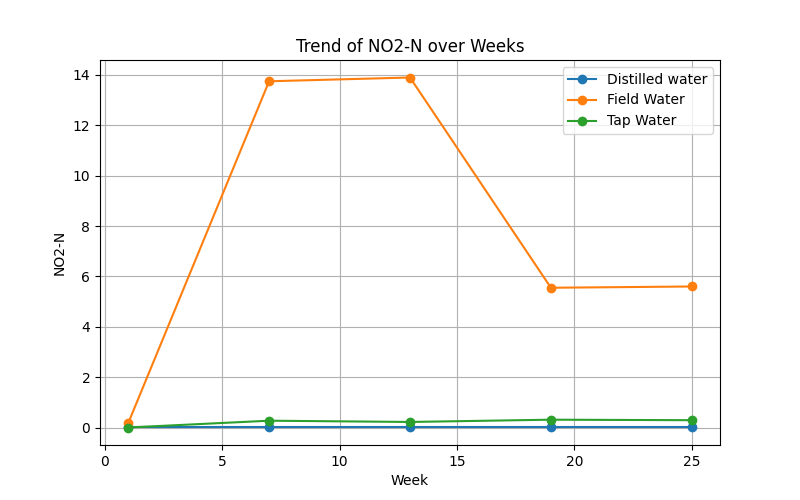

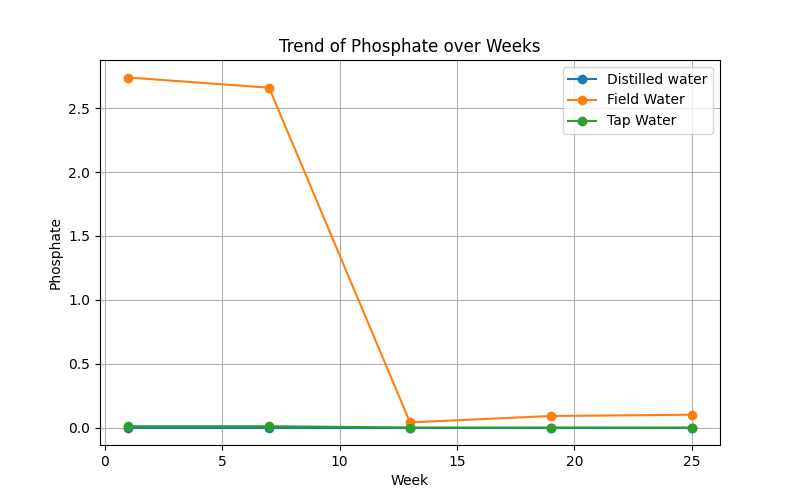

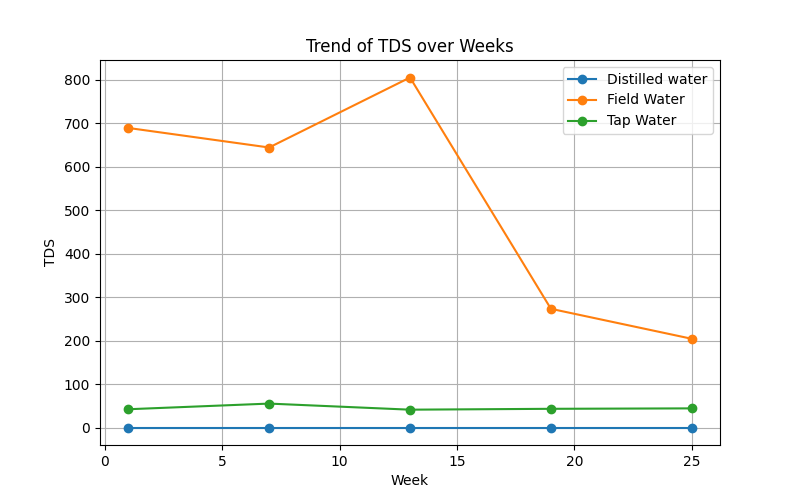

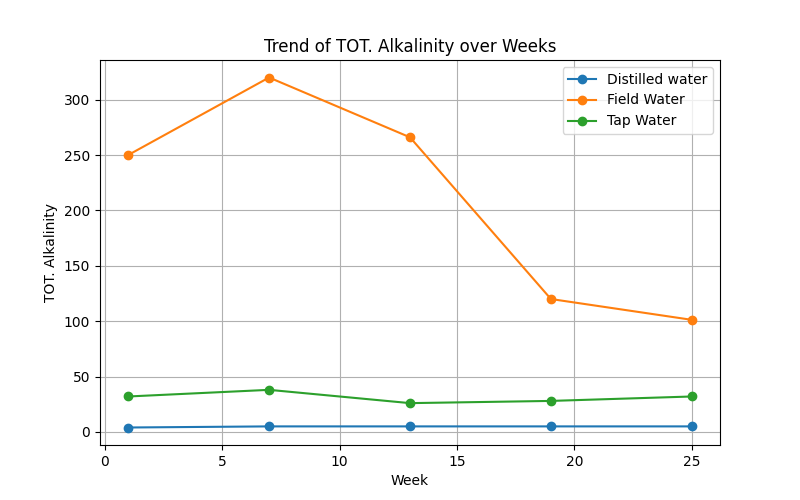

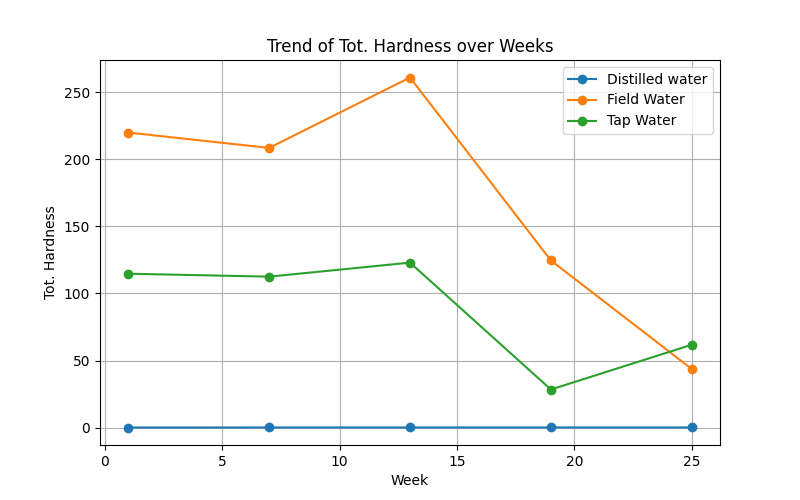

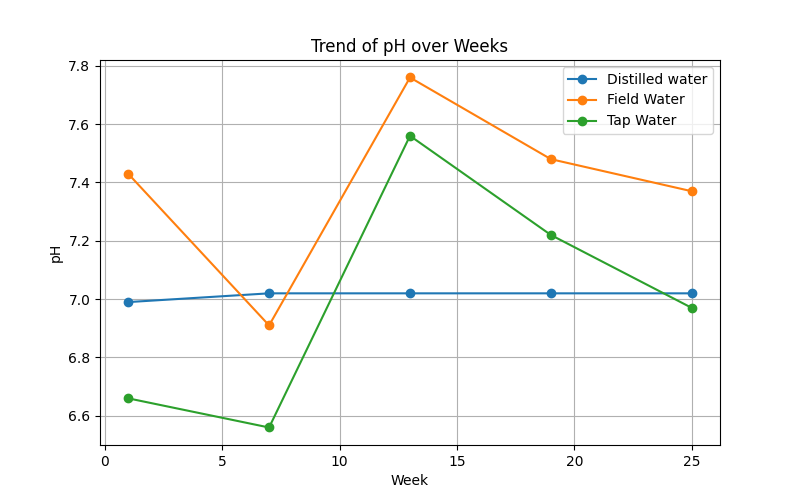

Supplement: Supplementary file 5 [file e683817b8a410fa614f9f92a.docx]
