# Supplementary material for: Larval breeding water drives differential selection pressures on genetic insecticide resistance and metabolic enzyme plasticity in Anopheles gambiae s.l
Source: Research Square preprint supplement (doi:10.21203/rs.3.rs-8493684/v1), 2026-01-08
Supplement: Supplementary file 1 [file 14070389d51d6dc7188e4fc7.xlsx]

## Sheet: glmm_coefs
	Estimate	Std. Error	z value	Pr(>|z|)	Odds_Ratio	CI_Lower	CI_Upper
(Intercept)	-3.08077	0.591429	-5.20902	1.9e-07	0.0459239	0.014408	0.146377
insecticideBEN	-0.472535	0.929108	-0.50859	0.611039	0.62342	0.100904	3.85171
insecticideDM	1.23902	0.681677	1.81761	0.0691237	3.45224	0.907498	13.1327
insecticideDM + PBO	5.88071	0.78358	7.50493	6.15e-14	358.063	77.0837	1663.24
insecticidePIRI	0.0463978	0.835669	0.0555217	0.955723	1.04749	0.203617	5.38872
insecticidePM	-1.08099	1.16818	-0.925369	0.354774	0.339258	0.0343683	3.3489
insecticidePM + PBO	2.81187	0.639993	4.39359	1.11e-05	16.6409	4.74685	58.3379
waterTap Water	-7.36e-05	0.835182	-8.81e-05	0.99993	0.999926	0.194557	5.13913
waterDistilled Water	-5.87e-05	0.835179	-7.03e-05	0.999944	0.999941	0.194561	5.13918
genF1	0.628679	0.752378	0.835589	0.403386	1.87513	0.429136	8.19348
genF2	-18.7281	6807.62	-0.00275106	0.997805	7.35e-09	0	Inf
genF3	-18.8387	6772.49	-0.00278166	0.997781	6.58e-09	0	Inf
genF4	0.233872	0.783133	0.298636	0.765218	1.26348	0.272241	5.86388
genF5	0.280205	0.783594	0.357589	0.720651	1.3234	0.284894	6.14751
genF6	-18.8794	6774.14	-0.00278698	0.997776	6.32e-09	0	Inf
genF7	-18.7823	6766.72	-0.00277568	0.997785	6.97e-09	0	Inf
genF8	1.65426	0.687512	2.40615	0.0161216	5.2292	1.35898	20.1214
genF9	0.516916	0.751153	0.688164	0.49135	1.67685	0.38468	7.3095
genF10	0.762129	0.729317	1.04499	0.296028	2.14283	0.513076	8.94943
insecticideBEN:waterTap Water	0.000138387	1.31394	0.000105322	0.999916	1.00014	0.0761398	13.1374
insecticideDM:waterTap Water	5.67e-05	0.96404	5.88e-05	0.999953	1.00006	0.151153	6.61656
insecticideDM + PBO:waterTap Water	-7.96e-06	1.10814	-7.18e-06	0.999994	0.999992	0.113953	8.77541
insecticidePIRI:waterTap Water	8.17e-05	1.18182	6.91e-05	0.999945	1.00008	0.0986389	10.1396
insecticidePM:waterTap Water	0.000159506	1.65203	9.66e-05	0.999923	1.00016	0.0392493	25.4863
insecticidePM + PBO:waterTap Water	0.000117638	0.905082	0.000129975	0.999896	1.00012	0.16968	5.89484
insecticideBEN:waterDistilled Water	8.08e-05	1.31395	6.15e-05	0.999951	1.00008	0.0761345	13.1368
insecticideDM:waterDistilled Water	6.98e-05	0.964037	7.24e-05	0.999942	1.00007	0.151156	6.6166
insecticideDM + PBO:waterDistilled Water	7.95e-05	1.10815	7.17e-05	0.999943	1.00008	0.113961	8.77633
insecticidePIRI:waterDistilled Water	-8.59e-05	1.18184	-7.27e-05	0.999942	0.999914	0.0986188	10.1383
insecticidePM:waterDistilled Water	0.000234321	1.652	0.000141841	0.999887	1.00023	0.0392544	25.4868
insecticidePM + PBO:waterDistilled Water	0.000135672	0.905079	0.000149901	0.99988	1.00014	0.169684	5.89492
insecticideBEN:genF1	-18.8413	6822.4	-0.00276168	0.997796	6.57e-09	0	Inf
insecticideDM:genF1	-1.51014	0.973924	-1.55058	0.121003	0.220878	0.0327441	1.48996
insecticideDM + PBO:genF1	-4.79828	0.959656	-5	5.73e-07	0.0082439	0.00125677	0.0540765
insecticidePIRI:genF1	-1.00134	1.19693	-0.836591	0.402822	0.367387	0.0351785	3.8368
insecticidePM:genF1	-18.2456	6797.94	-0.00268398	0.997858	1.19e-08	0	Inf
insecticidePM + PBO:genF1	-3.08302	0.945218	-3.2617	0.00110746	0.0458207	0.00718582	0.292178
insecticideBEN:genF2	18.7438	6807.62	0.00275336	0.997803	1.38144e+08	0	Inf
insecticideDM:genF2	17.4315	6807.62	0.00256058	0.997957	3.71866e+07	0	Inf
insecticideDM + PBO:genF2	16.5799	6807.62	0.0024355	0.998057	1.58698e+07	0	Inf
insecticidePIRI:genF2	-0.10528	9620.02	-1.09e-05	0.999991	0.900072	0	Inf
insecticidePM:genF2	18.6417	6807.62	0.00273836	0.997815	1.24735e+08	0	Inf
insecticidePM + PBO:genF2	16.5826	6807.62	0.00243589	0.998056	1.59122e+07	0	Inf
insecticideBEN:genF3	18.2282	6772.49	0.00269151	0.997852	8.24919e+07	0	Inf
insecticideDM:genF3	17.943	6772.49	0.00264939	0.997886	6.20204e+07	0	Inf
insecticideDM + PBO:genF3	16.6901	6772.49	0.0024644	0.998034	1.77182e+07	0	Inf
insecticidePIRI:genF3	-0.0131723	9573.22	-1.38e-06	0.999999	0.986914	0	Inf
insecticidePM:genF3	19.8055	6772.49	0.0029244	0.997667	3.99405e+08	0	Inf
insecticidePM + PBO:genF3	17.0601	6772.49	0.00251902	0.99799	2.56505e+07	0	Inf
insecticideBEN:genF4	-0.182234	1.28188	-0.142162	0.886952	0.833406	0.0675617	10.2805
insecticideDM:genF4	0.216158	0.904746	0.238915	0.811171	1.2413	0.210737	7.31159
insecticideDM + PBO:genF4	1.24727	1.37582	0.906566	0.364636	3.48082	0.234727	51.618
insecticidePIRI:genF4	-0.313534	1.14513	-0.273798	0.78424	0.73086	0.0774605	6.89585
insecticidePM:genF4	-0.302187	1.62608	-0.185838	0.852572	0.739199	0.0305222	17.9023
insecticidePM + PBO:genF4	0.626703	0.855351	0.732685	0.463751	1.87143	0.350013	10.0061
insecticideBEN:genF5	0.37954	1.18007	0.321625	0.747737	1.46161	0.144656	14.7682
insecticideDM:genF5	-0.727511	0.942013	-0.772294	0.43994	0.48311	0.0762409	3.06128
insecticideDM + PBO:genF5	-1.63778	0.983698	-1.66493	0.0959275	0.19441	0.0282735	1.33678
insecticidePIRI:genF5	-0.352166	1.14545	-0.307448	0.758503	0.703164	0.0744784	6.63869
insecticidePM:genF5	1.55401	1.33669	1.16258	0.244999	4.73041	0.344418	64.9697
insecticidePM + PBO:genF5	-2.38101	0.925872	-2.57164	0.0101218	0.092457	0.0150599	0.567621
insecticideBEN:genF6	0.47226	9580.74	4.93e-05	0.999961	1.60361	0	Inf
insecticideDM:genF6	20.1512	6774.14	0.00297472	0.997627	5.64357e+08	0	Inf
insecticideDM + PBO:genF6	20.3852	6774.14	0.00300927	0.997599	7.1314e+08	0	Inf
insecticidePIRI:genF6	0.0195717	9586.99	2.04e-06	0.999998	1.01976	0	Inf
insecticidePM:genF6	21.0565	6774.14	0.00310836	0.99752	1395434834	0	Inf
insecticidePM + PBO:genF6	20.9415	6774.14	0.00309138	0.997533	1243826063	0	Inf
insecticideBEN:genF7	0.487061	9569.63	5.09e-05	0.999959	1.62753	0	Inf
insecticideDM:genF7	-1.20897	9566.88	-0.00012637	0.999899	0.298506	0	Inf
insecticideDM + PBO:genF7	16.7469	6766.72	0.00247489	0.998025	1.8754e+07	0	Inf
insecticidePIRI:genF7	19.385	6766.72	0.00286476	0.997714	2.62306e+08	0	Inf
insecticidePM:genF7	18.78	6766.72	0.00277535	0.997786	1.43235e+08	0	Inf
insecticidePM + PBO:genF7	17.1298	6766.72	0.00253148	0.99798	2.75038e+07	0	Inf
insecticideBEN:genF8	-1.50559	1.2264	-1.22765	0.219578	0.221886	0.0200538	2.45506
insecticideDM:genF8	-1.55318	0.840345	-1.84827	0.0645634	0.211573	0.0407517	1.09844
insecticideDM + PBO:genF8	-2.56053	0.939064	-2.72668	0.00639752	0.0772641	0.012264	0.486771
insecticidePIRI:genF8	-0.0479579	0.96208	-0.0498482	0.960243	0.953174	0.144622	6.28219
insecticidePM:genF8	0.405664	1.28416	0.3159	0.752079	1.5003	0.121083	18.5897
insecticidePM + PBO:genF8	-2.40508	0.783364	-3.0702	0.00213914	0.0902579	0.019439	0.419081
insecticideBEN:genF9	-0.491954	1.26244	-0.389684	0.69677	0.61143	0.0514911	7.26042
insecticideDM:genF9	-0.435834	0.893011	-0.48805	0.625514	0.646725	0.11235	3.72277
insecticideDM + PBO:genF9	-1.92929	0.955435	-2.01928	0.0434584	0.145251	0.0223274	0.944939
insecticidePIRI:genF9	-1.76089	1.38854	-1.26816	0.204741	0.171892	0.0113059	2.61339
insecticidePM:genF9	1.69672	1.30658	1.29859	0.194084	5.45602	0.421395	70.642
insecticidePM + PBO:genF9	-1.00771	0.831758	-1.21155	0.225686	0.365053	0.0715071	1.86364
insecticideBEN:genF10	-1.47372	1.43555	-1.02659	0.304612	0.229071	0.0137406	3.81886
insecticideDM:genF10	-0.288714	0.862792	-0.334627	0.737906	0.749226	0.138099	4.06478
insecticideDM + PBO:genF10	-2.29285	0.936605	-2.44805	0.0143633	0.100978	0.0161055	0.633113
insecticidePIRI:genF10	-0.0313377	1.03195	-0.0303674	0.975774	0.969148	0.128225	7.32497
insecticidePM:genF10	0.595329	1.34652	0.442126	0.658398	1.81363	0.12953	25.3937
insecticidePM + PBO:genF10	-1.6535	0.82151	-2.01276	0.0441403	0.191379	0.0382481	0.957586
waterTap Water:genF1	1.36066	0.996657	1.36523	0.172182	3.89877	0.552785	27.4979
waterDistilled Water:genF1	-1.78238	1.38913	-1.28308	0.199462	0.168238	0.0110527	2.56082
waterTap Water:genF2	19.3226	6807.62	0.00283838	0.997735	2.4644e+08	0	Inf
waterDistilled Water:genF2	19.1014	6807.62	0.00280588	0.997761	1.97523e+08	0	Inf
waterTap Water:genF3	20.0487	6772.49	0.00296031	0.997638	5.09385e+08	0	Inf
waterDistilled Water:genF3	18.8101	6772.49	0.00277742	0.997784	1.47608e+08	0	Inf
waterTap Water:genF4	-0.0459978	1.14634	-0.0401257	0.967993	0.955044	0.100981	9.03252
waterDistilled Water:genF4	0.203477	1.10907	0.183466	0.854432	1.22566	0.139415	10.7753
waterTap Water:genF5	-19.16	6775.83	-0.00282771	0.997744	4.77e-09	0	Inf
waterDistilled Water:genF5	0.348777	1.08633	0.321059	0.748165	1.41733	0.168565	11.9173
waterTap Water:genF6	18.9618	6774.14	0.00279915	0.997767	1.71795e+08	0	Inf
waterTap Water:genF7	19.362	6766.72	0.00286135	0.997717	256328807	0	Inf
waterTap Water:genF8	-0.553708	0.973649	-0.568694	0.569564	0.574814	0.0852592	3.87538
waterTap Water:genF9	-19.2618	6806.48	-0.00282992	0.997742	4.31e-09	0	Inf
waterTap Water:genF10	-19.5146	6798.1	-0.00287059	0.99771	3.35e-09	0	Inf
insecticideBEN:waterTap Water:genF1	19.3092	6822.4	0.00283026	0.997742	243149525	0	Inf
insecticideDM:waterTap Water:genF1	0.93118	1.24529	0.747763	0.454603	2.5375	0.221002	29.1351
insecticideDM + PBO:waterTap Water:genF1	0.485364	1.29281	0.375433	0.707338	1.62477	0.128922	20.4764
insecticidePIRI:waterTap Water:genF1	1.15641	1.51125	0.765203	0.444151	3.1785	0.16437	61.4642
insecticidePM:waterTap Water:genF1	18.2092	6797.94	0.00267863	0.997863	8.09396e+07	0	Inf
insecticidePM + PBO:waterTap Water:genF1	-2.23631	1.37679	-1.62429	0.104313	0.106853	0.00719182	1.58756
insecticideBEN:waterDistilled Water:genF1	20.6517	6822.4	0.00302704	0.997585	9.30897e+08	0	Inf
insecticideDM:waterDistilled Water:genF1	0.28358	1.8557	0.152816	0.878543	1.32788	0.0349588	50.438
insecticideDM + PBO:waterDistilled Water:genF1	3.04011	1.61467	1.88281	0.0597267	20.9076	0.882812	495.154
insecticidePIRI:waterDistilled Water:genF1	1.6161	1.91319	0.844716	0.39827	5.03343	0.118392	213.996
insecticidePM:waterDistilled Water:genF1	20.4842	6797.94	0.00301329	0.997596	7.87347e+08	0	Inf
insecticidePM + PBO:waterDistilled Water:genF1	2.22808	1.57338	1.41611	0.156744	9.28204	0.424964	202.738
insecticideBEN:waterTap Water:genF2	-18.8938	6807.62	-0.0027754	0.997786	6.23e-09	0	Inf
insecticideDM:waterTap Water:genF2	-17.1478	6807.62	-0.00251892	0.99799	3.57e-08	0	Inf
insecticideDM + PBO:waterTap Water:genF2	-17.2802	6807.62	-0.00253836	0.997975	3.13e-08	0	Inf
insecticidePIRI:waterTap Water:genF2	0.344885	9620.02	3.59e-05	0.999971	1.41183	0	Inf
insecticidePM:waterTap Water:genF2	-17.8918	6807.62	-0.00262821	0.997903	1.7e-08	0	Inf
insecticidePM + PBO:waterTap Water:genF2	-16.4135	6807.62	-0.00241105	0.998076	7.44e-08	0	Inf
insecticideBEN:waterDistilled Water:genF2	-18.0123	6807.62	-0.0026459	0.997889	1.5e-08	0	Inf
insecticideDM:waterDistilled Water:genF2	-19.1425	6807.62	-0.00281192	0.997756	4.86e-09	0	Inf
insecticideDM + PBO:waterDistilled Water:genF2	-19.9998	6807.62	-0.00293786	0.997656	2.06e-09	0	Inf
insecticidePIRI:waterDistilled Water:genF2	-0.748246	9620.02	-7.78e-05	0.999938	0.473196	0	Inf
insecticidePM:waterDistilled Water:genF2	-18.382	6807.62	-0.00270021	0.997846	1.04e-08	0	Inf
insecticidePM + PBO:waterDistilled Water:genF2	-19.5075	6807.62	-0.00286554	0.997714	3.37e-09	0	Inf
insecticideBEN:waterTap Water:genF3	-37.2426	8682.11	-0.00428958	0.996577	6.7e-17	0	Inf
insecticideDM:waterTap Water:genF3	-20.6256	6772.49	-0.00304549	0.99757	1.1e-09	0	Inf
insecticideDM + PBO:waterTap Water:genF3	-17.7258	6772.49	-0.00261733	0.997912	2e-08	0	Inf
insecticidePIRI:waterTap Water:genF3	-19.6409	11306.3	-0.00173717	0.998614	2.95e-09	0	Inf
insecticidePM:waterTap Water:genF3	-19.7818	6772.49	-0.00292091	0.997669	2.56e-09	0	Inf
insecticidePM + PBO:waterTap Water:genF3	-18.8339	6772.49	-0.00278095	0.997781	6.61e-09	0	Inf
insecticideBEN:waterDistilled Water:genF3	-16.9313	6772.49	-0.00250002	0.998005	4.43e-08	0	Inf
insecticideDM:waterDistilled Water:genF3	-19.0694	6772.49	-0.00281571	0.997753	5.23e-09	0	Inf
insecticideDM + PBO:waterDistilled Water:genF3	-19.3007	6772.49	-0.00284986	0.997726	4.15e-09	0	Inf
insecticidePIRI:waterDistilled Water:genF3	0.33258	9573.22	3.47e-05	0.999972	1.39456	0	Inf
insecticidePM:waterDistilled Water:genF3	-17.8488	6772.49	-0.00263548	0.997897	1.77e-08	0	Inf
insecticidePM + PBO:waterDistilled Water:genF3	-17.4551	6772.49	-0.00257735	0.997944	2.63e-08	0	Inf
insecticideBEN:waterTap Water:genF4	0.483958	1.79098	0.27022	0.786991	1.62248	0.0484921	54.2861
insecticideDM:waterTap Water:genF4	-1.04615	1.36091	-0.768712	0.442064	0.351289	0.0243914	5.05932
insecticideDM + PBO:waterTap Water:genF4	-2.07514	1.73161	-1.19839	0.230767	0.125539	0.004215	3.73902
insecticidePIRI:waterTap Water:genF4	0.774503	1.59495	0.485596	0.627253	2.16951	0.0952165	49.4325
insecticidePM:waterTap Water:genF4	1.6777	2.13911	0.784298	0.432865	5.35323	0.0808665	354.375
insecticidePM + PBO:waterTap Water:genF4	-2.50865	1.27901	-1.96141	0.0498316	0.0813778	0.00663427	0.998203
insecticideBEN:waterDistilled Water:genF4	0.808766	1.7295	0.467631	0.640049	2.24514	0.0756947	66.5916
insecticideDM:waterDistilled Water:genF4	-2.29531	1.43767	-1.59655	0.110366	0.10073	0.00601712	1.68628
insecticideDM + PBO:waterDistilled Water:genF4	-1.42565	1.7675	-0.806591	0.419902	0.240352	0.00752177	7.68025
insecticidePIRI:waterDistilled Water:genF4	-18.7686	6127.61	-0.00306296	0.997556	7.06e-09	0	Inf
insecticidePM:waterDistilled Water:genF4	-17.5779	6130.76	-0.00286716	0.997712	2.32e-08	0	Inf
insecticidePM + PBO:waterDistilled Water:genF4	-0.933193	1.21593	-0.76747	0.442802	0.393296	0.0362823	4.26328
insecticideBEN:waterTap Water:genF5	18.6684	6775.83	0.00275515	0.997802	1.28108e+08	0	Inf
insecticideDM:waterTap Water:genF5	17.2549	6775.83	0.00254653	0.997968	3.11672e+07	0	Inf
insecticideDM + PBO:waterTap Water:genF5	17.1149	6775.83	0.00252588	0.997985	2.70972e+07	0	Inf
insecticidePIRI:waterTap Water:genF5	19.5731	6775.83	0.00288866	0.997695	3.1658e+08	0	Inf
insecticidePM:waterTap Water:genF5	18.7418	6775.83	0.00276598	0.997793	1.37867e+08	0	Inf
insecticidePM + PBO:waterTap Water:genF5	19.0773	6775.83	0.0028155	0.997754	1.9283e+08	0	Inf
insecticideBEN:waterDistilled Water:genF5	-0.530991	1.67989	-0.316087	0.751936	0.588022	0.0218496	15.825
insecticideDM:waterDistilled Water:genF5	-1.05529	1.38549	-0.761676	0.446253	0.34809	0.0230325	5.2607
insecticideDM + PBO:waterDistilled Water:genF5	-0.477014	1.37467	-0.347001	0.72859	0.620634	0.0419458	9.18295
insecticidePIRI:waterDistilled Water:genF5	-18.8215	6107.94	-0.00308148	0.997541	6.7e-09	0	Inf
insecticidePM:waterDistilled Water:genF5	-1.05171	1.92828	-0.545412	0.58547	0.349341	0.00797749	15.2979
insecticidePM + PBO:waterDistilled Water:genF5	1.69667	1.24243	1.36561	0.172063	5.45576	0.477833	62.2923
insecticideBEN:waterTap Water:genF6	-1.14446	9580.74	-0.000119454	0.999905	0.318396	0	Inf
insecticideDM:waterTap Water:genF6	-21.4039	6774.14	-0.00315964	0.997479	5.06e-10	0	Inf
insecticideDM + PBO:waterTap Water:genF6	-23.6176	6774.14	-0.00348643	0.997218	5.53e-11	0	Inf
insecticidePIRI:waterTap Water:genF6	-1.22718	9586.99	-0.000128005	0.999898	0.293118	0	Inf
insecticidePM:waterTap Water:genF6	-21.1064	6774.14	-0.00311573	0.997514	6.82e-10	0	Inf
insecticidePM + PBO:waterTap Water:genF6	-24.8677	6774.14	-0.00367098	0.997071	1.59e-11	0	Inf
insecticideBEN:waterTap Water:genF7	0.165658	9569.63	1.73e-05	0.999986	1.18017	0	Inf
insecticideDM:waterTap Water:genF7	-1.0126	9566.88	-0.000105845	0.999916	0.363272	0	Inf
insecticideDM + PBO:waterTap Water:genF7	-20.4954	6766.72	-0.00302885	0.997583	1.26e-09	0	Inf
insecticidePIRI:waterTap Water:genF7	-18.9885	6766.72	-0.00280615	0.997761	5.67e-09	0	Inf
insecticidePM:waterTap Water:genF7	-17.4868	6766.72	-0.00258423	0.997938	2.54e-08	0	Inf
insecticidePM + PBO:waterTap Water:genF7	-19.5031	6766.72	-0.00288221	0.9977	3.39e-09	0	Inf
insecticideBEN:waterTap Water:genF8	1.71218	1.62845	1.05142	0.293068	5.54102	0.227732	134.82
insecticideDM:waterTap Water:genF8	-0.479447	1.25027	-0.383474	0.701369	0.619126	0.0533981	7.17848
insecticideDM + PBO:waterTap Water:genF8	-2.93248	1.31253	-2.23423	0.0254681	0.0532647	0.00406627	0.697724
insecticidePIRI:waterTap Water:genF8	-0.318486	1.39068	-0.229014	0.818858	0.72725	0.0476334	11.1034
insecticidePM:waterTap Water:genF8	-0.149048	1.84539	-0.0807676	0.935627	0.861528	0.023144	32.0701
insecticidePM + PBO:waterTap Water:genF8	-0.541518	1.14453	-0.473134	0.636117	0.581864	0.0617411	5.48364
insecticideBEN:waterTap Water:genF9	19.2621	6806.48	0.00282997	0.997742	2.31974e+08	0	Inf
insecticideDM:waterTap Water:genF9	17.9315	6806.48	0.00263447	0.997898	6.13119e+07	0	Inf
insecticideDM + PBO:waterTap Water:genF9	16.4187	6806.48	0.00241222	0.998075	1.35073e+07	0	Inf
insecticidePIRI:waterTap Water:genF9	20.8314	6806.48	0.00306052	0.997558	1114150415	0	Inf
insecticidePM:waterTap Water:genF9	-0.444465	9178.9	-4.84e-05	0.999961	0.641167	0	Inf
insecticidePM + PBO:waterTap Water:genF9	-1.59842	9133.46	-0.000175007	0.99986	0.202216	0	Inf
insecticideBEN:waterTap Water:genF10	20.6411	6798.1	0.0030363	0.997577	9.21081e+08	0	Inf
insecticideDM:waterTap Water:genF10	17.3713	6798.1	0.00255532	0.997961	3.50153e+07	0	Inf
insecticideDM + PBO:waterTap Water:genF10	17.7493	6798.1	0.00261092	0.997917	5.11002e+07	0	Inf
insecticidePIRI:waterTap Water:genF10	18.6966	6798.1	0.00275027	0.997806	131777711	0	Inf
insecticidePM:waterTap Water:genF10	18.7198	6798.1	0.00275367	0.997803	1.34861e+08	0	Inf
insecticidePM + PBO:waterTap Water:genF10	18.6743	6798.1	0.00274699	0.997808	128867249	0	Inf
