# Supplementary material for: Larval breeding water drives differential selection pressures on genetic insecticide resistance and metabolic enzyme plasticity in Anopheles gambiae s.l
Source: Research Square preprint supplement (doi:10.21203/rs.3.rs-8493684/v1), 2026-01-08
Supplement: Supplementary file 2 [file 209be0bcc12277a2b4b5c302.xlsx]

## Sheet: heatmap_sig
contrast	insecticide	water	odds.ratio	SE	df	lower CI	upper CI	z.ratio	p.value
F1 / F0	BEN	Distilled Water	1.9283	1.70141	Inf	0.207986	17.8778	0.7442	0.86818
F10 / F0	BEN	Distilled Water	NA	NA	NA	NA	NA	NA	NA
F2 / F0	BEN	Distilled Water	3.01849	2.58219	Inf	0.348429	26.1496	1.29142	0.550991
F3 / F0	BEN	Distilled Water	3.5544	2.96993	Inf	0.431417	29.2843	1.51776	0.408231
F4 / F0	BEN	Distilled Water	2.89759	2.47783	Inf	0.334747	25.0817	1.24411	0.581713
F5 / F0	BEN	Distilled Water	1.61209	1.49793	Inf	0.154491	16.8219	0.513925	0.948543
F6 / F0	BEN	Distilled Water	NA	NA	NA	NA	NA	NA	NA
F7 / F0	BEN	Distilled Water	NA	NA	NA	NA	NA	NA	NA
F8 / F0	BEN	Distilled Water	NA	NA	NA	NA	NA	NA	NA
F9 / F0	BEN	Distilled Water	NA	NA	NA	NA	NA	NA	NA
F1 / F0	BEN	Field Water	1.23126e-08	8.40012e-05	Inf	2.22045e-16	Inf	-0.00266954	1
F10 / F0	BEN	Field Water	0.490861	0.606939	Inf	0.0166562	14.4657	-0.575501	0.980776
F2 / F0	BEN	Field Water	1.01578	1.03055	Inf	0.0632657	16.3093	0.0154371	1
F3 / F0	BEN	Field Water	0.543062	0.671877	Inf	0.0183912	16.0357	-0.493478	0.98919
F4 / F0	BEN	Field Water	1.05299	1.06861	Inf	0.0655296	16.9205	0.0508826	0.999999
F5 / F0	BEN	Field Water	1.9343	1.70671	Inf	0.172975	21.6303	0.747721	0.950405
F6 / F0	BEN	Field Water	1.01361e-08	6.8673e-05	Inf	2.22045e-16	Inf	-0.00271689	1
F7 / F0	BEN	Field Water	1.13367e-08	7.67127e-05	Inf	2.22045e-16	Inf	-0.00270368	1
F8 / F0	BEN	Field Water	1.16029	1.17832	Inf	0.072066	18.681	0.146391	0.999907
F9 / F0	BEN	Field Water	1.02528	1.0403	Inf	0.0638368	16.4668	0.024601	1
F1 / F0	BEN	Tap Water	11.6721	8.98764	Inf	1.41939	95.9837	3.19114	0.0125222
F10 / F0	BEN	Tap Water	1.51421	1.40626	Inf	0.119275	19.2231	0.446748	0.992593
F2 / F0	BEN	Tap Water	1.55965	1.44882	Inf	0.122774	19.8128	0.478458	0.990384
F3 / F0	BEN	Tap Water	1.85202e-08	0.000100612	Inf	2.22045e-16	Inf	-0.00327737	1
F4 / F0	BEN	Tap Water	1.63166	1.51632	Inf	0.128313	20.7486	0.526837	0.986171
F5 / F0	BEN	Tap Water	1.18303	1.20162	Inf	0.0734457	19.0558	0.165482	0.999849
F6 / F0	BEN	Tap Water	0.554433	0.686029	Inf	0.0187686	16.3783	-0.47667	0.990519
F7 / F0	BEN	Tap Water	3.42947	2.86437	Inf	0.348883	33.7112	1.47554	0.598498
F8 / F0	BEN	Tap Water	3.69558	3.03067	Inf	0.391861	34.8525	1.59391	0.520281
F9 / F0	BEN	Tap Water	1.02559	1.04057	Inf	0.0638626	16.4702	0.024901	1
F1 / F0	DDT	Distilled Water	0.315468	0.368387	Inf	0.0165567	6.01086	-0.987968	0.742215
F10 / F0	DDT	Distilled Water	NA	NA	NA	NA	NA	NA	NA
F2 / F0	DDT	Distilled Water	1.4524	1.13953	Inf	0.200491	10.5215	0.47569	0.95793
F3 / F0	DDT	Distilled Water	0.971732	0.811366	Inf	0.118122	7.994	-0.0343424	0.999964
F4 / F0	DDT	Distilled Water	1.5486	1.21616	Inf	0.213368	11.2395	0.556897	0.93666
F5 / F0	DDT	Distilled Water	1.8757	1.41129	Inf	0.280827	12.5282	0.835956	0.825137
F6 / F0	DDT	Distilled Water	NA	NA	NA	NA	NA	NA	NA
F7 / F0	DDT	Distilled Water	NA	NA	NA	NA	NA	NA	NA
F8 / F0	DDT	Distilled Water	NA	NA	NA	NA	NA	NA	NA
F9 / F0	DDT	Distilled Water	NA	NA	NA	NA	NA	NA	NA
F1 / F0	DDT	Field Water	1.87513	1.41081	Inf	0.239296	14.6936	0.835589	0.927066
F10 / F0	DDT	Field Water	2.14283	1.5628	Inf	0.291271	15.7645	1.04499	0.847931
F2 / F0	DDT	Field Water	7.35306e-09	5.00568e-05	Inf	2.22045e-16	Inf	-0.00275106	1
F3 / F0	DDT	Field Water	6.58322e-09	4.45848e-05	Inf	2.22045e-16	Inf	-0.00278166	1
F4 / F0	DDT	Field Water	1.26348	0.989475	Inf	0.148226	10.7699	0.298636	0.998444
F5 / F0	DDT	Field Water	1.3234	1.03701	Inf	0.15506	11.2949	0.357589	0.996858
F6 / F0	DDT	Field Water	6.3208e-09	4.2818e-05	Inf	2.22045e-16	Inf	-0.00278698	1
F7 / F0	DDT	Field Water	6.96558e-09	4.71341e-05	Inf	2.22045e-16	Inf	-0.00277568	1
F8 / F0	DDT	Field Water	5.2292	3.59514	Inf	0.796935	34.3121	2.40615	0.117223
F9 / F0	DDT	Field Water	1.67685	1.25957	Inf	0.214711	13.0958	0.688164	0.963081
F1 / F0	DDT	Tap Water	7.31071	4.7788	Inf	1.22226	43.7276	3.04334	0.0201517
F10 / F0	DDT	Tap Water	7.17662e-09	4.87874e-05	Inf	2.22045e-16	Inf	-0.00275848	1
F2 / F0	DDT	Tap Water	1.81209	1.36273	Inf	0.231476	14.1858	0.79051	0.939749
F3 / F0	DDT	Tap Water	3.35339	2.35475	Inf	0.490929	22.906	1.72312	0.436445
F4 / F0	DDT	Tap Water	1.20668	1.01017	Inf	0.122113	11.924	0.224422	0.999495
F5 / F0	DDT	Tap Water	6.31813e-09	4.28105e-05	Inf	2.22045e-16	Inf	-0.00278635	1
F6 / F0	DDT	Tap Water	1.08588	0.9078	Inf	0.110231	10.6969	0.0985512	0.999981
F7 / F0	DDT	Tap Water	1.78548	1.3424	Inf	0.22819	13.9705	0.771022	0.944767
F8 / F0	DDT	Tap Water	3.00582	2.07238	Inf	0.455661	19.8282	1.59626	0.518733
F9 / F0	DDT	Tap Water	7.2308e-09	4.92163e-05	Inf	2.22045e-16	Inf	-0.00275398	1
F1 / F0	DM	Distilled Water	0.0925264	0.0984202	Inf	0.00631444	1.3558	-2.23772	0.10253
F10 / F0	DM	Distilled Water	NA	NA	NA	NA	NA	NA	NA
F2 / F0	DM	Distilled Water	0.262423	0.178631	Inf	0.047085	1.46259	-1.96533	0.186191
F3 / F0	DM	Distilled Water	0.315036	0.215088	Inf	0.0562342	1.7649	-1.69181	0.309921
F4 / F0	DM	Distilled Water	0.19363	0.153884	Inf	0.026053	1.43909	-2.06586	0.150915
F5 / F0	DM	Distilled Water	0.315429	0.215347	Inf	0.0563086	1.76696	-1.69006	0.310839
F6 / F0	DM	Distilled Water	NA	NA	NA	NA	NA	NA	NA
F7 / F0	DM	Distilled Water	NA	NA	NA	NA	NA	NA	NA
F8 / F0	DM	Distilled Water	NA	NA	NA	NA	NA	NA	NA
F9 / F0	DM	Distilled Water	NA	NA	NA	NA	NA	NA	NA
F1 / F0	DM	Field Water	0.414176	0.25614	Inf	0.0762542	2.24961	-1.42532	0.631345
F10 / F0	DM	Field Water	1.60547	0.74009	Inf	0.454768	5.66778	1.02697	0.856038
F2 / F0	DM	Field Water	0.273436	0.186235	Inf	0.0424103	1.76295	-1.90384	0.327998
F3 / F0	DM	Field Water	0.408293	0.252422	Inf	0.0752113	2.21647	-1.44891	0.61597
F4 / F0	DM	Field Water	1.56836	0.710543	Inf	0.454004	5.41789	0.993335	0.870533
F5 / F0	DM	Field Water	0.639348	0.334281	Inf	0.1529	2.67342	-0.855522	0.920971
F6 / F0	DM	Field Water	3.56718	1.49714	Inf	1.13129	11.248	3.03022	0.0209957
F7 / F0	DM	Field Water	2.07926e-09	1.40618e-05	Inf	2.22045e-16	Inf	-0.00295602	1
F8 / F0	DM	Field Water	1.10636	0.534637	Inf	0.294872	4.15106	0.209162	0.999618
F9 / F0	DM	Field Water	1.08446	0.523725	Inf	0.289275	4.06552	0.167893	0.99984
F1 / F0	DM	Tap Water	4.0975	1.71372	Inf	1.30469	12.8686	3.37222	0.00676341
F10 / F0	DM	Tap Water	0.188274	0.149573	Inf	0.0214144	1.65529	-2.10192	0.227587
F2 / F0	DM	Tap Water	2.40638	1.02589	Inf	0.749447	7.72659	2.05977	0.247102
F3 / F0	DM	Tap Water	0.229321	0.18266	Inf	0.0259349	2.0277	-1.84882	0.359553
F4 / F0	DM	Tap Water	0.526179	0.303501	Inf	0.108563	2.55025	-1.11323	0.815132
F5 / F0	DM	Tap Water	0.0951331	0.101209	Inf	0.00517696	1.74819	-2.21125	0.181824
F6 / F0	DM	Tap Water	0.310284	0.211784	Inf	0.0479343	2.0085	-1.71456	0.441882
F7 / F0	DM	Tap Water	0.193615	0.153879	Inf	0.0220024	1.70376	-2.06587	0.244216
F8 / F0	DM	Tap Water	0.393734	0.24325	Inf	0.072616	2.13488	-1.5087	0.576626
F9 / F0	DM	Tap Water	0.286715	0.195427	Inf	0.0444076	1.85116	-1.83283	0.368987
F1 / F0	DM + PBO	Distilled Water	0.0543741	0.0308834	Inf	0.0129665	0.228014	-5.1267	1.46978e-06
F10 / F0	DM + PBO	Distilled Water	NA	NA	NA	NA	NA	NA	NA
F2 / F0	DM + PBO	Distilled Water	0.0475175	0.0271631	Inf	0.0112271	0.201112	-5.32964	4.91021e-07
F3 / F0	DM + PBO	Distilled Water	0.0714147	0.0409731	Inf	0.0167846	0.303853	-4.60012	2.09464e-05
F4 / F0	DM + PBO	Distilled Water	1.29559	1.01557	Inf	0.17917	9.36852	0.330371	0.983921
F5 / F0	DM + PBO	Distilled Water	0.226317	0.135027	Inf	0.0502053	1.0202	-2.49036	0.0546443
F6 / F0	DM + PBO	Distilled Water	NA	NA	NA	NA	NA	NA	NA
F7 / F0	DM + PBO	Distilled Water	NA	NA	NA	NA	NA	NA	NA
F8 / F0	DM + PBO	Distilled Water	NA	NA	NA	NA	NA	NA	NA
F9 / F0	DM + PBO	Distilled Water	NA	NA	NA	NA	NA	NA	NA
F1 / F0	DM + PBO	Field Water	0.0154584	0.00920873	Inf	0.00302863	0.0789011	-6.99938	2.57399e-11
F10 / F0	DM + PBO	Field Water	0.216379	0.127154	Inf	0.0433391	1.08032	-2.60484	0.0713232
F2 / F0	DM + PBO	Field Water	0.116691	0.0669002	Inf	0.0243076	0.560191	-3.74706	0.00168824
F3 / F0	DM + PBO	Field Water	0.116643	0.0668719	Inf	0.0242977	0.559952	-3.74781	0.00168329
F4 / F0	DM + PBO	Field Water	4.39796	4.97495	Inf	0.19906	97.167	1.30936	0.704761
F5 / F0	DM + PBO	Field Water	0.257283	0.153008	Inf	0.0505457	1.30959	-2.28277	0.155658
F6 / F0	DM + PBO	Field Water	4.50762	5.09826	Inf	0.204114	99.5454	1.33132	0.691203
F7 / F0	DM + PBO	Field Water	0.130632	0.0760068	Inf	0.026584	0.641923	-3.49818	0.00431441
F8 / F0	DM + PBO	Field Water	0.40403	0.258454	Inf	0.0701825	2.32593	-1.41673	0.636918
F9 / F0	DM + PBO	Field Water	0.243565	0.143813	Inf	0.0484112	1.22541	-2.39203	0.12121
F1 / F0	DM + PBO	Tap Water	0.0979227	0.0556687	Inf	0.0206683	0.46394	-4.08723	0.000421507
F10 / F0	DM + PBO	Tap Water	0.0370313	0.0210361	Inf	0.00782541	0.175239	-5.80217	6.53576e-08
F2 / F0	DM + PBO	Tap Water	0.899596	0.656385	Inf	0.122171	6.62412	-0.145015	0.999911
F3 / F0	DM + PBO	Tap Water	1.19034	0.934359	Inf	0.138952	10.1971	0.221974	0.999516
F4 / F0	DM + PBO	Tap Water	0.527293	0.335495	Inf	0.0924587	3.00716	-1.00588	0.865227
F5 / F0	DM + PBO	Tap Water	0.0332838	0.0191934	Inf	0.00686993	0.161255	-5.90067	3.61552e-08
F6 / F0	DM + PBO	Tap Water	0.0428514	0.0249524	Inf	0.00870926	0.210838	-5.4096	6.29443e-07
F7 / F0	DM + PBO	Tap Water	0.0420552	0.0239212	Inf	0.00886901	0.199418	-5.57094	2.52721e-07
F8 / F0	DM + PBO	Tap Water	0.0123703	0.00747913	Inf	0.00236534	0.0646945	-7.26502	3.76066e-12
F9 / F0	DM + PBO	Tap Water	0.0141865	0.00843295	Inf	0.00278915	0.0721569	-7.15884	8.16813e-12
F1 / F0	PIRI	Distilled Water	0.583368	0.542271	Inf	0.0558538	6.09303	-0.579781	0.929747
F10 / F0	PIRI	Distilled Water	NA	NA	NA	NA	NA	NA	NA
F2 / F0	PIRI	Distilled Water	0.618594	0.575286	Inf	0.0591609	6.46809	-0.516465	0.947881
F3 / F0	PIRI	Distilled Water	1.33741	1.04962	Inf	0.184509	9.69415	0.370447	0.978214
F4 / F0	PIRI	Distilled Water	7.99207e-09	4.89723e-05	Inf	2.22045e-16	Inf	-0.00304275	1
F5 / F0	PIRI	Distilled Water	8.83385e-09	5.39567e-05	Inf	2.22045e-16	Inf	-0.00303616	1
F6 / F0	PIRI	Distilled Water	NA	NA	NA	NA	NA	NA	NA
F7 / F0	PIRI	Distilled Water	NA	NA	NA	NA	NA	NA	NA
F8 / F0	PIRI	Distilled Water	NA	NA	NA	NA	NA	NA	NA
F9 / F0	PIRI	Distilled Water	NA	NA	NA	NA	NA	NA	NA
F1 / F0	PIRI	Field Water	0.688898	0.64129	Inf	0.053941	8.79815	-0.400327	0.995137
F10 / F0	PIRI	Field Water	2.07672	1.51621	Inf	0.281683	15.3107	1.00095	0.867325
F2 / F0	PIRI	Field Water	6.61829e-09	4.49855e-05	Inf	2.22045e-16	Inf	-0.00277079	1
F3 / F0	PIRI	Field Water	6.49707e-09	4.39597e-05	Inf	2.22045e-16	Inf	-0.00278624	1
F4 / F0	PIRI	Field Water	0.923428	0.7715	Inf	0.093877	9.08337	-0.0953498	0.999983
F5 / F0	PIRI	Field Water	0.930567	0.777492	Inf	0.094595	9.15434	-0.0861291	0.999989
F6 / F0	PIRI	Field Water	6.44573e-09	4.37272e-05	Inf	2.22045e-16	Inf	-0.00278009	1
F7 / F0	PIRI	Field Water	1.82711	1.37612	Inf	0.232664	14.3483	0.800266	0.937133
F8 / F0	PIRI	Field Water	4.98434	3.35466	Inf	0.790304	31.4355	2.38664	0.122758
F9 / F0	PIRI	Field Water	0.288236	0.336611	Inf	0.0118018	7.03964	-1.0652	0.838557
F1 / F0	PIRI	Tap Water	8.53701	5.55919	Inf	1.43701	50.7167	3.29308	0.00889213
F10 / F0	PIRI	Tap Water	0.916541	0.765637	Inf	0.0932073	9.01268	-0.104325	0.999976
F2 / F0	PIRI	Tap Water	2.30271	1.64188	Inf	0.327273	16.2019	1.16979	0.785572
F3 / F0	PIRI	Tap Water	9.76833e-09	5.87611e-05	Inf	2.22045e-16	Inf	-0.00306611	1
F4 / F0	PIRI	Tap Water	1.91333	1.39521	Inf	0.260154	14.0717	0.889794	0.909784
F5 / F0	PIRI	Tap Water	1.40646	1.10446	Inf	0.164036	12.0592	0.434342	0.993349
F6 / F0	PIRI	Tap Water	0.324582	0.379337	Inf	0.0132585	7.94612	-0.962798	0.882958
F7 / F0	PIRI	Tap Water	2.6545	1.89702	Inf	0.375602	18.7602	1.36607	0.669387
F8 / F0	PIRI	Tap Water	2.08362	1.52123	Inf	0.282624	15.3613	1.0055	0.865387
F9 / F0	PIRI	Tap Water	1.38479	1.08723	Inf	0.161578	11.8683	0.414651	0.994433
F1 / F0	PM	Distilled Water	2.95922	3.45684	Inf	0.155149	56.4425	0.928749	0.776045
F10 / F0	PM	Distilled Water	NA	NA	NA	NA	NA	NA	NA
F2 / F0	PM	Distilled Water	1.88311	2.32983	Inf	0.0829357	42.7573	0.511568	0.949154
F3 / F0	PM	Distilled Water	6.87597	7.53329	Inf	0.432953	109.201	1.7598	0.275413
F4 / F0	PM	Distilled Water	2.6591e-08	0.000163023	Inf	2.22045e-16	Inf	-0.00284511	1
F5 / F0	PM	Distilled Water	3.09964	3.62195	Inf	0.162368	59.1728	0.968148	0.753732
F6 / F0	PM	Distilled Water	NA	NA	NA	NA	NA	NA	NA
F7 / F0	PM	Distilled Water	NA	NA	NA	NA	NA	NA	NA
F8 / F0	PM	Distilled Water	NA	NA	NA	NA	NA	NA	NA
F9 / F0	PM	Distilled Water	NA	NA	NA	NA	NA	NA	NA
F1 / F0	PM	Field Water	2.23402e-08	0.000151868	Inf	2.22045e-16	Inf	-0.0025915	1
F10 / F0	PM	Field Water	3.8863	4.39893	Inf	0.17556	86.0297	1.19927	0.769377
F2 / F0	PM	Field Water	0.917187	1.30703	Inf	0.018578	45.2811	-0.0606604	0.999997
F3 / F0	PM	Field Water	2.62937	3.06986	Inf	0.107749	64.1641	0.82803	0.929299
F4 / F0	PM	Field Water	0.933965	1.33098	Inf	0.0189155	46.1151	-0.0479382	0.999999
F5 / F0	PM	Field Water	6.26022	6.77939	Inf	0.323353	121.2	1.69375	0.455182
F6 / F0	PM	Field Water	8.82026	9.49232	Inf	0.46406	167.644	2.02292	0.265006
F7 / F0	PM	Field Water	0.997715	1.42218	Inf	0.0201868	49.3111	-0.00160489	1
F8 / F0	PM	Field Water	7.84536	8.50912	Inf	0.403378	152.586	1.89924	0.330579
F9 / F0	PM	Field Water	9.14892	9.78094	Inf	0.490813	170.539	2.0706	0.241991
F1 / F0	PM	Tap Water	7.0498	7.72512	Inf	0.351543	141.376	1.78227	0.399519
F10 / F0	PM	Tap Water	1.75531	2.17102	Inf	0.0595057	51.7788	0.454912	0.992063
F2 / F0	PM	Tap Water	3.83567	4.34105	Inf	0.173341	84.875	1.18783	0.775719
F3 / F0	PM	Tap Water	3.43365	4.01489	Inf	0.140034	84.1936	1.05503	0.843311
F4 / F0	PM	Tap Water	4.77497	5.2975	Inf	0.229385	99.3975	1.40918	0.641799
F5 / F0	PM	Tap Water	4.12047	4.66551	Inf	0.185949	91.3062	1.25055	0.740035
F6 / F0	PM	Tap Water	1.03299	1.47275	Inf	0.0208843	51.0939	0.0227635	1
F7 / F0	PM	Tap Water	6.50724	7.12687	Inf	0.324998	130.291	1.71008	0.444733
F8 / F0	PM	Tap Water	3.88517	4.39744	Inf	0.175534	85.9921	1.19907	0.769489
F9 / F0	PM	Tap Water	2.52949e-08	0.000155772	Inf	2.22045e-16	Inf	-0.00284053	1
F1 / F0	PM + PBO	Distilled Water	0.134171	0.0627141	Inf	0.04124	0.436517	-4.2973	8.53268e-05
F10 / F0	PM + PBO	Distilled Water	NA	NA	NA	NA	NA	NA	NA
F2 / F0	PM + PBO	Distilled Water	0.0779482	0.0445014	Inf	0.0184513	0.329295	-4.46955	3.88087e-05
F3 / F0	PM + PBO	Distilled Water	0.654608	0.238081	Inf	0.261413	1.63922	-1.16502	0.632821
F4 / F0	PM + PBO	Distilled Water	1.13981	0.411191	Inf	0.458569	2.83307	0.362735	0.979394
F5 / F0	PM + PBO	Distilled Water	0.946146	0.328209	Inf	0.39421	2.27085	-0.159583	0.997709
F6 / F0	PM + PBO	Distilled Water	NA	NA	NA	NA	NA	NA	NA
F7 / F0	PM + PBO	Distilled Water	NA	NA	NA	NA	NA	NA	NA
F8 / F0	PM + PBO	Distilled Water	NA	NA	NA	NA	NA	NA	NA
F9 / F0	PM + PBO	Distilled Water	NA	NA	NA	NA	NA	NA	NA
F1 / F0	PM + PBO	Field Water	0.0859199	0.0491596	Inf	0.0179542	0.41117	-4.28963	0.000174455
F10 / F0	PM + PBO	Field Water	0.410093	0.155061	Inf	0.14573	1.15403	-2.35742	0.13142
F2 / F0	PM + PBO	Field Water	0.117003	0.0576155	Inf	0.03041	0.450172	-4.3571	0.000128807
F3 / F0	PM + PBO	Field Water	0.168863	0.0728782	Inf	0.0518392	0.550059	-4.12127	0.000364457
F4 / F0	PM + PBO	Field Water	2.36452	0.813297	Inf	0.922563	6.06024	2.50197	0.0928098
F5 / F0	PM + PBO	Field Water	0.122358	0.0603405	Inf	0.031739	0.471704	-4.25999	0.000199037
F6 / F0	PM + PBO	Field Water	7.86197	3.21251	Inf	2.5701	24.0498	5.04642	4.47027e-06
F7 / F0	PM + PBO	Field Water	0.19158	0.0831598	Inf	0.0584134	0.628327	-3.80684	0.00133451
F8 / F0	PM + PBO	Field Water	0.471977	0.177205	Inf	0.168946	1.31854	-1.99979	0.276635
F9 / F0	PM + PBO	Field Water	0.612138	0.218647	Inf	0.230347	1.62673	-1.37407	0.664309
F1 / F0	PM + PBO	Tap Water	0.0357937	0.0271382	Inf	0.00449585	0.284971	-4.39206	0.000109876
F10 / F0	PM + PBO	Tap Water	0.176993	0.0739151	Inf	0.0564518	0.554925	-4.1465	0.000326964
F2 / F0	PM + PBO	Tap Water	2.14598	0.738128	Inf	0.837292	5.50012	2.22001	0.17846
F3 / F0	PM + PBO	Tap Water	0.568989	0.207189	Inf	0.210078	1.54109	-1.54859	0.550239
F4 / F0	PM + PBO	Tap Water	0.183769	0.0828885	Inf	0.0534891	0.631363	-3.75587	0.00163112
F5 / F0	PM + PBO	Tap Water	0.112643	0.0594123	Inf	0.026602	0.476971	-4.13987	0.000336442
F6 / F0	PM + PBO	Tap Water	0.0214104	0.0222322	Inf	0.00124926	0.366941	-3.7018	0.00201216
F7 / F0	PM + PBO	Tap Water	0.166365	0.0747285	Inf	0.0486706	0.568663	-3.99295	0.000626694
F8 / F0	PM + PBO	Tap Water	0.157859	0.0742109	Inf	0.0436126	0.571384	-3.92687	0.000823009
F9 / F0	PM + PBO	Tap Water	5.33774e-10	3.25084e-06	Inf	2.22045e-16	Inf	-0.00350574	1
