# Supplementary material for: Larval breeding water drives differential selection pressures on genetic insecticide resistance and metabolic enzyme plasticity in Anopheles gambiae s.l
Source: Research Square preprint supplement (doi:10.21203/rs.3.rs-8493684/v1), 2026-01-08
Supplement: Supplementary file 3 [file b633a1b6612aa1c0255f2480.xlsx]

## Sheet: glm_coefs
	Estimate	Std. Error	z value	Pr(>|z|)	Odds_Ratio	CI_Lower	CI_Upper
(Intercept)	1.04799	0.231707	4.5229	6.09984e-06	2.8519	1.81093	4.49125
gen_numeric	-0.0281202	0.038519	-0.730035	0.465369	0.972271	0.90157	1.04852
mutationkdr_w	2.46909	0.524065	4.71143	2.45987e-06	11.8117	4.22883	32.9918
waterTW	-0.139673	0.335853	-0.415875	0.677502	0.869643	0.450253	1.67967
waterDW	-0.178295	0.371949	-0.479353	0.631688	0.836696	0.403607	1.73451
gen_numeric:mutationkdr_w	-0.212095	0.0751362	-2.82281	0.00476048	0.808888	0.698121	0.937228
gen_numeric:waterTW	0.148132	0.0601469	2.46284	0.013784	1.15967	1.03071	1.30476
gen_numeric:waterDW	0.0515774	0.104266	0.494673	0.620831	1.05293	0.858316	1.29167
mutationkdr_w:waterTW	-0.874076	0.848229	-1.03047	0.302788	0.417247	0.0791346	2.19999
mutationkdr_w:waterDW	-1.12507	0.742679	-1.51488	0.129802	0.324629	0.0757192	1.39177
gen_numeric:mutationkdr_w:waterTW	0.960941	0.45654	2.10484	0.0353056	2.61415	1.06836	6.39655
gen_numeric:mutationkdr_w:waterDW	0.158361	0.187717	0.843614	0.398885	1.17159	0.810937	1.69264
