# Supplementary material for: Larval breeding water drives differential selection pressures on genetic insecticide resistance and metabolic enzyme plasticity in Anopheles gambiae s.l
Source: Research Square preprint supplement (doi:10.21203/rs.3.rs-8493684/v1), 2026-01-08
Supplement: Supplementary file 4 [file be6496f98dd7fe4f3f108075.xlsx]

## Sheet: enzyme_expression_differences
Enzyme	Generation	ANOVA_p_value	Comparison	p_adj
ache	F2	NA	DW-TW	0.00239625
ache	F3	NA	DW-TW	1.96e-07
ache	F3	NA	TW-FW	2.51e-06
ache	F4	NA	DW-TW	0.0269061
ache	F4	NA	DW-FW	0.0269593
ache	F5	NA	DW-FW	0.00274589
ache	F6	NA	TW-FW	0.00210296
ache	F8	NA	TW-FW	4.65e-07
ache	F9	NA	TW-FW	0.0180724
alpha	F0	NA	DW-FW	0.00024142
alpha	F0	NA	DW-TW	0.000337204
alpha	F1	NA	DW-FW	2.9e-14
alpha	F1	NA	DW-TW	6.64e-07
alpha	F1	NA	TW-FW	8.85e-06
alpha	F10	NA	TW-FW	0.00024466
alpha	F2	NA	DW-FW	3.57e-05
alpha	F2	NA	DW-TW	0.025027
alpha	F3	NA	DW-FW	0.0033642
alpha	F3	NA	TW-FW	0.0127357
alpha	F4	NA	DW-FW	9.81e-05
alpha	F4	NA	DW-TW	0.0358383
alpha	F5	NA	DW-TW	3.61e-12
alpha	F5	NA	TW-FW	6.1e-05
alpha	F5	NA	DW-FW	0.00268612
beta	F10	NA	TW-FW	0.0419924
beta	F4	NA	DW-TW	5.77e-05
beta	F4	NA	DW-FW	0.0258931
beta	F5	NA	DW-FW	5.3e-10
beta	F5	NA	DW-TW	1.09e-05
beta	F7	NA	TW-FW	0.00492617
beta	F8	NA	TW-FW	0.00234427
beta	F9	NA	TW-FW	0.00497479
oxidase	F0	NA	DW-TW	0.0297142
oxidase	F1	NA	DW-TW	2.44e-07
oxidase	F1	NA	DW-FW	0.0107017
oxidase	F1	NA	TW-FW	0.0204013
oxidase	F10	NA	TW-FW	1.69e-06
oxidase	F2	NA	TW-FW	0.000125871
oxidase	F2	NA	DW-TW	0.0156506
oxidase	F3	NA	TW-FW	7.59e-09
oxidase	F3	NA	DW-TW	2.91e-08
oxidase	F4	NA	DW-FW	0.000112799
oxidase	F4	NA	TW-FW	0.000152462
oxidase	F5	NA	DW-FW	6.06e-13
oxidase	F5	NA	TW-FW	1.01e-06
oxidase	F5	NA	DW-TW	0.0178999
oxidase	F7	NA	TW-FW	0.0165186
oxidase	F8	NA	TW-FW	4.53e-07
ache	F5	NA	TW-FW	0.0594167
beta	F0	NA	DW-TW	0.0605363
beta	F0	NA	TW-FW	0.0868612
ache	F2	NA	TW-FW	0.0921514
beta	F5	NA	TW-FW	0.104459
alpha	F2	NA	TW-FW	0.143567
oxidase	F0	NA	DW-FW	0.17277
beta	F4	NA	TW-FW	0.176186
alpha	F4	NA	TW-FW	0.179026
oxidase	F2	NA	DW-FW	0.33641
ache	F2	NA	DW-FW	0.507024
oxidase	F0	NA	TW-FW	0.721544
ache	F5	NA	DW-TW	0.767778
ache	F3	NA	DW-FW	0.870287
alpha	F3	NA	DW-TW	0.902667
oxidase	F3	NA	DW-FW	0.961581
beta	F0	NA	DW-FW	0.986617
alpha	F0	NA	TW-FW	0.995715
oxidase	F4	NA	DW-TW	0.996757
ache	F4	NA	TW-FW	0.99778
alpha	F0	4.55e-05	NA	NA
beta	F0	0.0407997	NA	NA
oxidase	F0	0.0332355	NA	NA
ache	F0	0.506989	NA	NA
alpha	F1	4.52e-18	NA	NA
beta	F1	0.137246	NA	NA
oxidase	F1	5.36e-07	NA	NA
ache	F1	0.0613846	NA	NA
alpha	F2	6.18e-05	NA	NA
beta	F2	0.0997587	NA	NA
oxidase	F2	0.000168319	NA	NA
ache	F2	0.00263924	NA	NA
alpha	F3	0.00202817	NA	NA
beta	F3	0.173373	NA	NA
oxidase	F3	2.49e-10	NA	NA
ache	F3	2.94e-08	NA	NA
alpha	F4	0.000163665	NA	NA
beta	F4	9.6e-05	NA	NA
oxidase	F4	1.75e-05	NA	NA
ache	F4	0.0120812	NA	NA
alpha	F5	8.82e-12	NA	NA
beta	F5	5.18e-10	NA	NA
oxidase	F5	7.6e-13	NA	NA
ache	F5	0.0029458	NA	NA
alpha	F6	0.105671	NA	NA
beta	F6	0.219958	NA	NA
oxidase	F6	0.117508	NA	NA
ache	F6	0.00210296	NA	NA
alpha	F7	0.147837	NA	NA
beta	F7	0.00492617	NA	NA
oxidase	F7	0.0165186	NA	NA
ache	F7	0.286705	NA	NA
alpha	F8	0.0547236	NA	NA
beta	F8	0.00234427	NA	NA
oxidase	F8	4.52e-07	NA	NA
ache	F8	4.65e-07	NA	NA
alpha	F9	0.708998	NA	NA
beta	F9	0.00497479	NA	NA
oxidase	F9	0.615614	NA	NA
ache	F9	0.0180724	NA	NA
alpha	F10	0.00024466	NA	NA
beta	F10	0.0419924	NA	NA
oxidase	F10	1.69e-06	NA	NA
ache	F10	0.0658191	NA	NA
